# Supplementary material for: The Predictive Role of Extracellular NAPRT for the Detection of Advanced Fibrosis in Biopsy-Proven Non-Alcoholic Fatty Liver Disease
Source: MDPI journal article supplement (doi:10.3390/ijms24021172), 2023-01-07
Supplement: s1 [file s1]

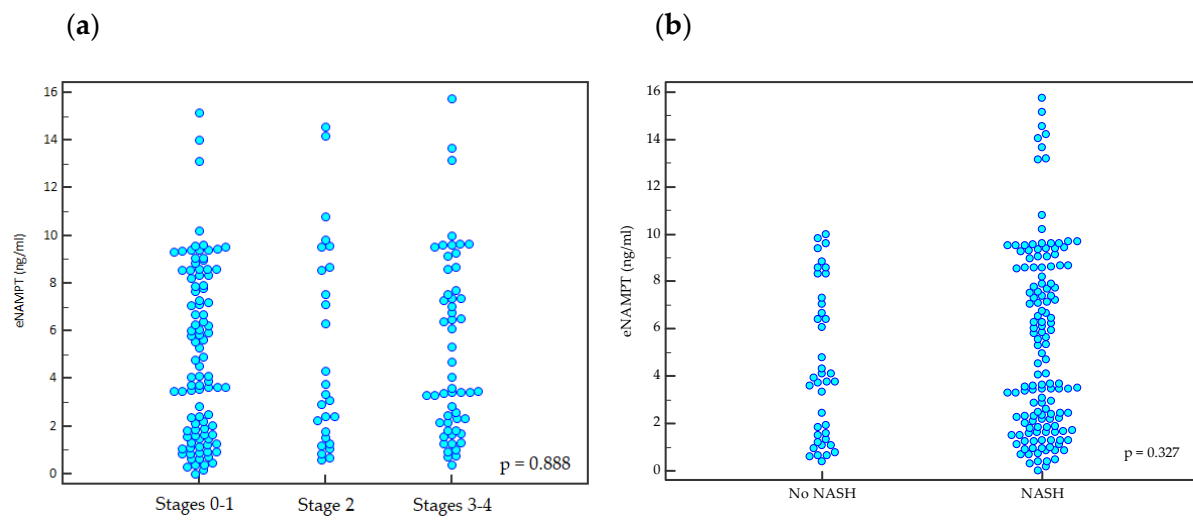

**Supplementary Figure S1.** Distribution of serum nicotinamide phosphoribosyltransferase (NAMPT) according to fibrosis stages (a) and to presence of NASH (b).
